# Supplementary material for: A series of AB2-type second-order nonlinear optical (NLO) polyaryleneethynylenes: using different end-capped spacers with adjustable bulk to achieve high NLO coefficients
Source: Royal Society of Chemistry journal article supplement (doi:10.1039/c3py00003f), 2013-01-01
Supplement: c3py00003f.pdf [file c3py00003f.pdf]

## Electronic Supplementary Information:

### A series of AB<sub>2</sub>-type second-order nonlinear optical (NLO) polyaryleneethynyls: using different end-capped spacers with adjustable bulk to achieve high NLO coefficients

Wenbo Wu,<sup>a</sup> Cheng Ye,<sup>b</sup> Jingui Qin,<sup>a</sup> and Zhen Li\*<sup>a</sup>

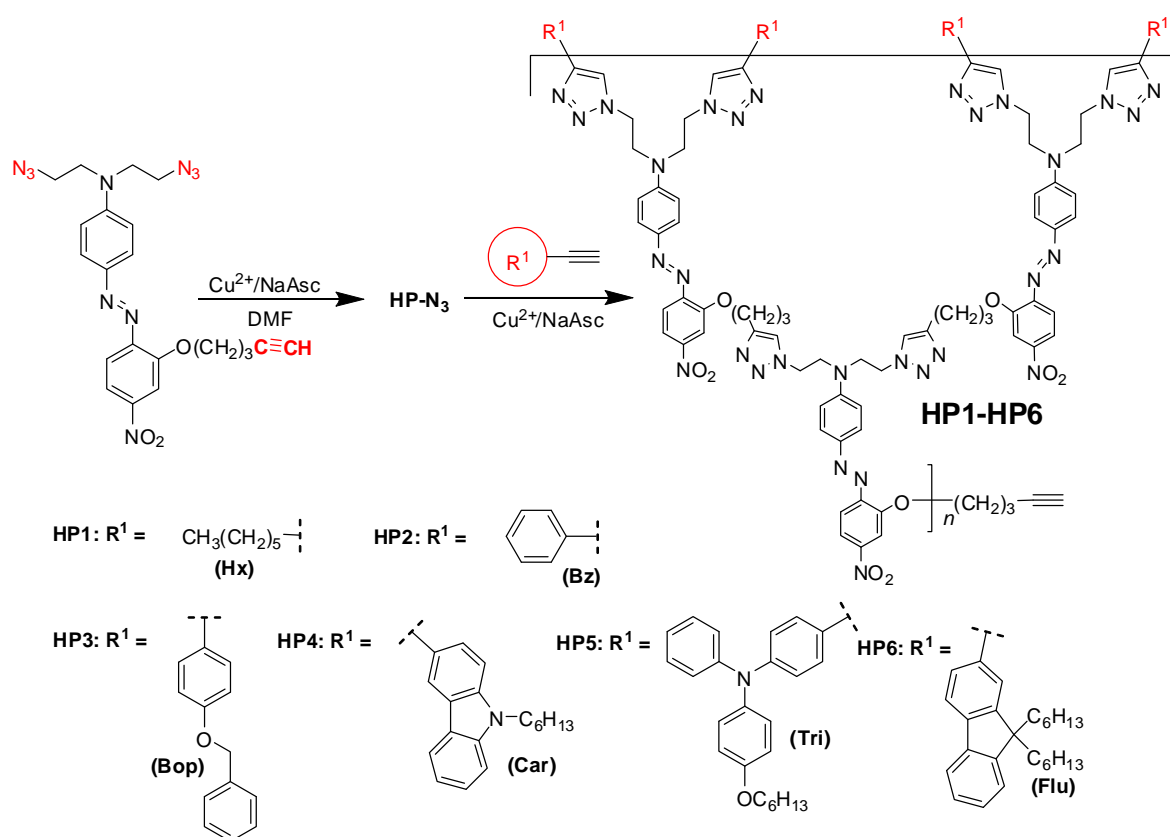

Chart S1 The structure and synthesis of **HP1-HP6**.

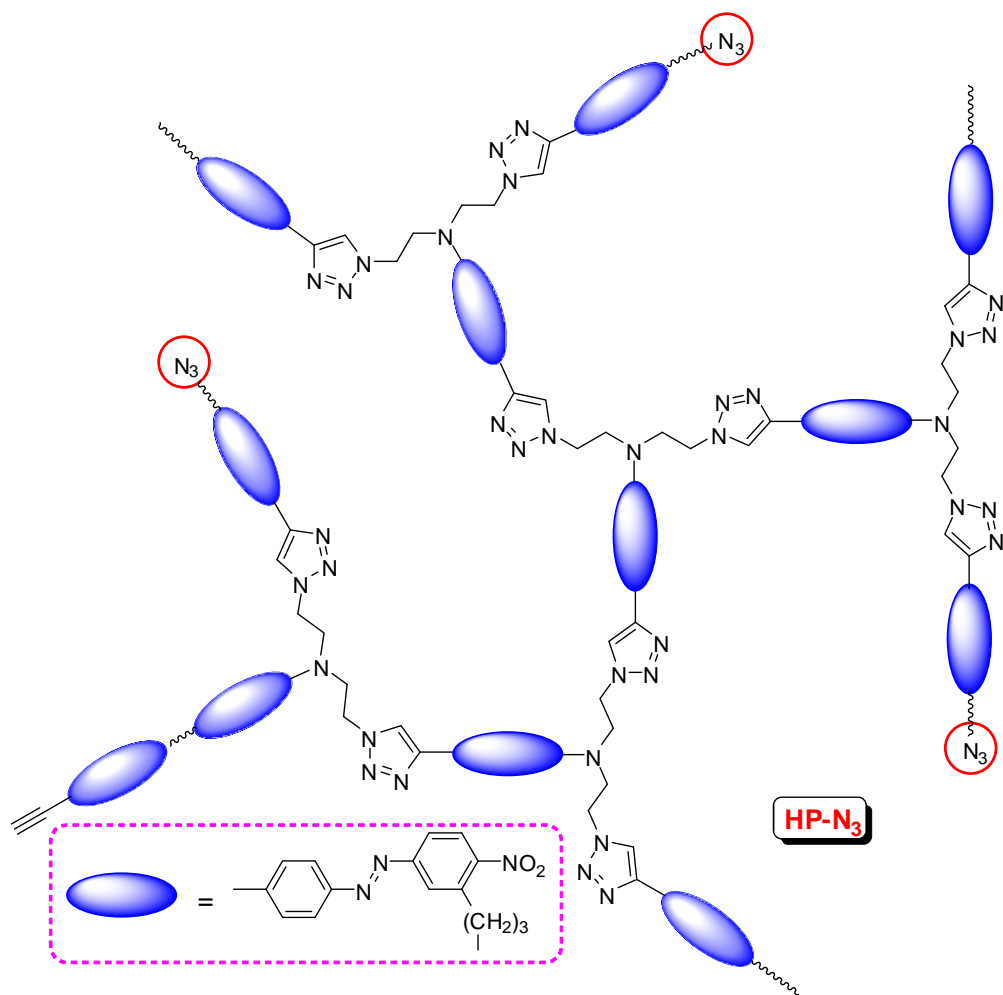

Chart S2 The structure of HP-N<sub>3</sub>.

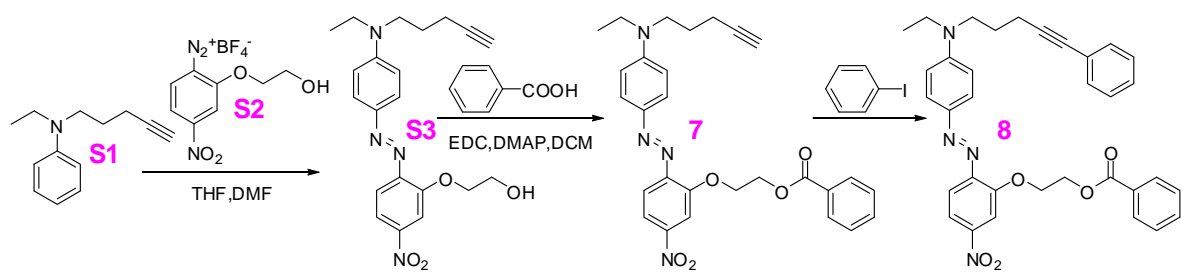

Scheme S1 The synthesis of model molecules 7 and 8.

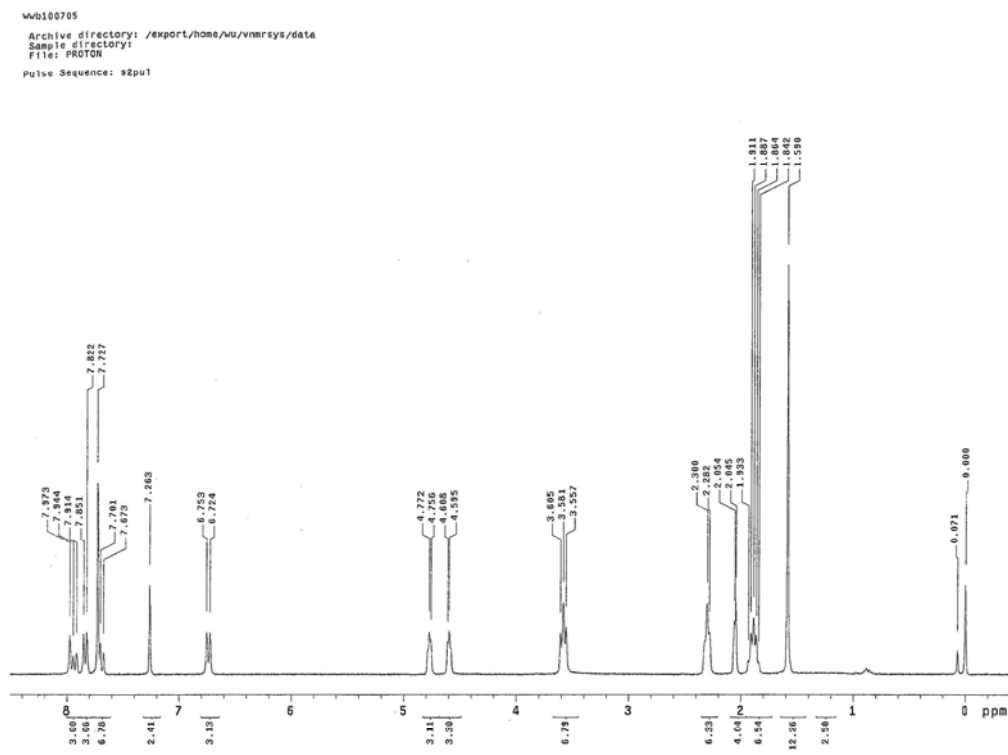

Fig. S1  $^1\text{H}$  NMR spectrum of AB<sub>2</sub>-type monomer **3** in chloroform-*d*.

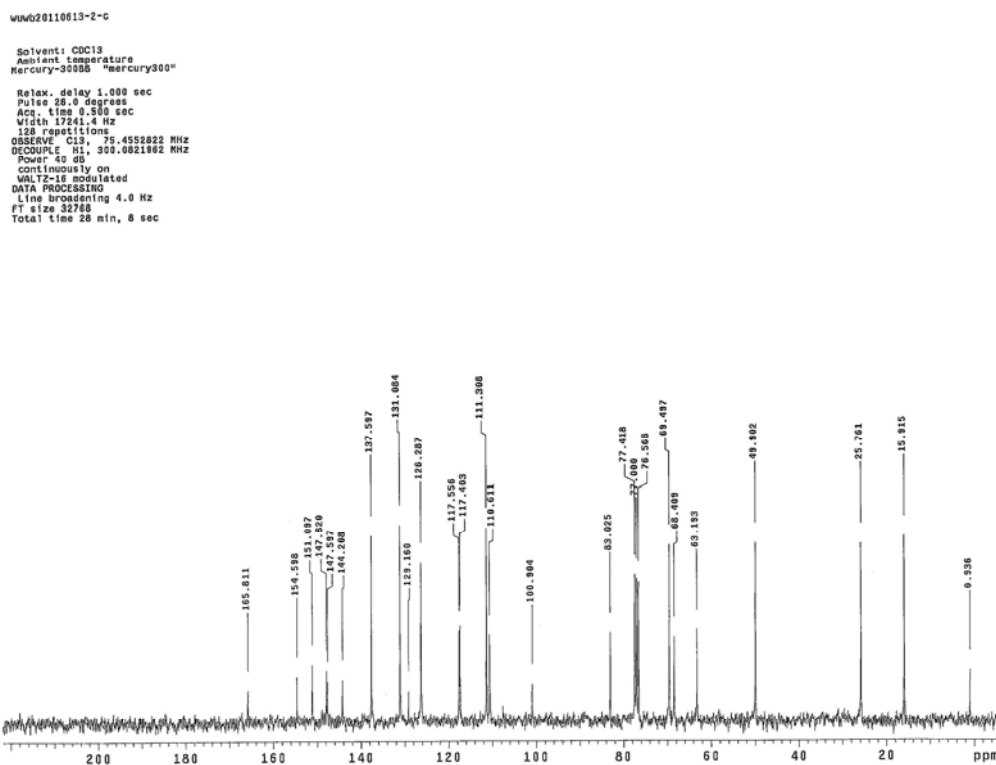

Fig. S2  $^{13}\text{C}$  NMR spectrum of AB<sub>2</sub>-type monomer **3** in chloroform-*d*.

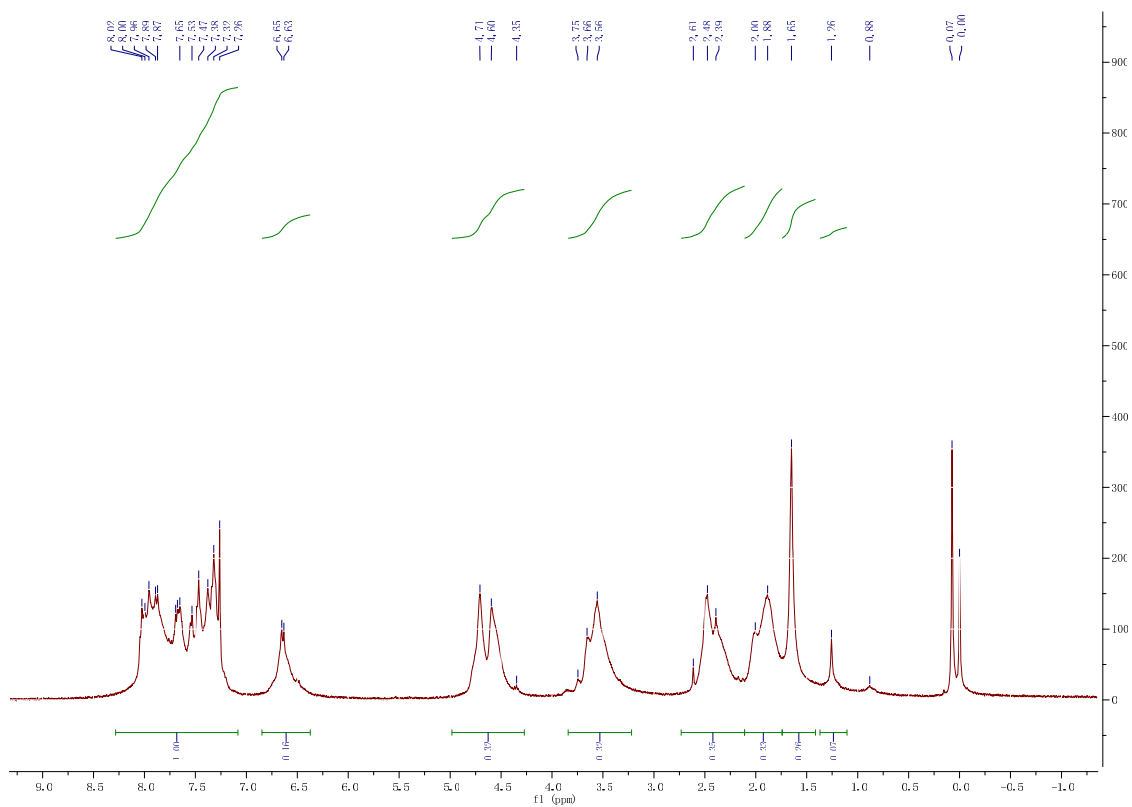

Fig. S3  $^1\text{H}$  NMR spectrum of hyperbranched polymer **P1** in chloroform-*d*.

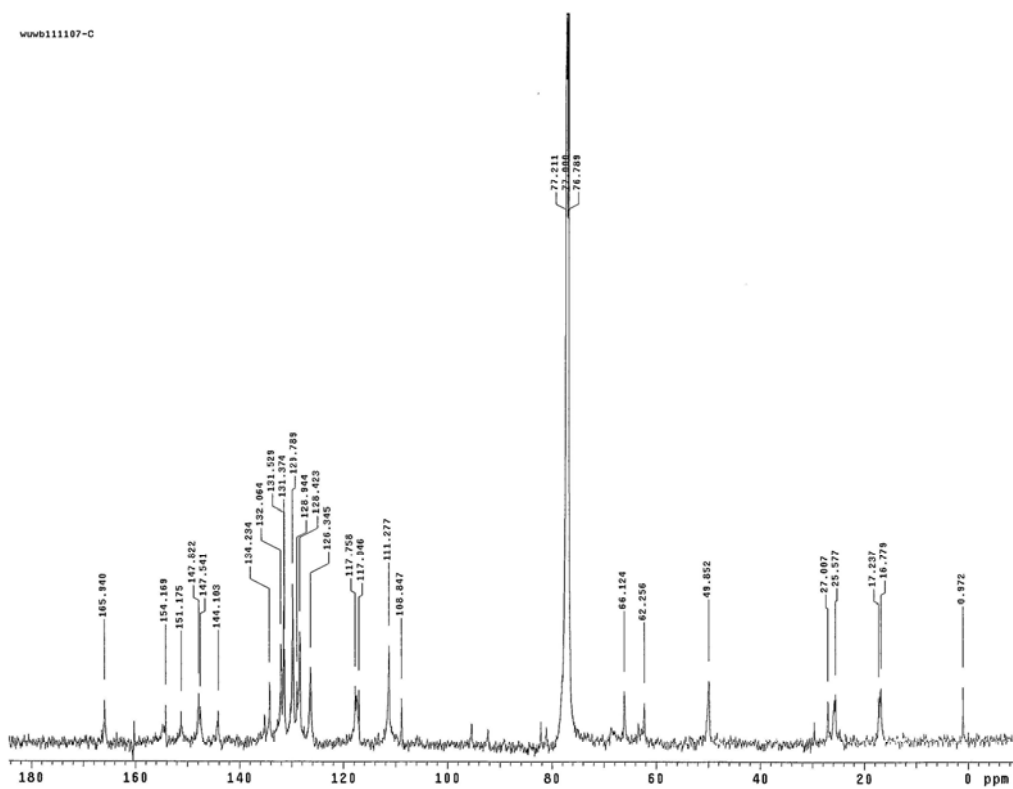

Fig. S4  $^{13}\text{C}$  NMR spectrum of hyperbranched polymer **P1** in chloroform-*d*.

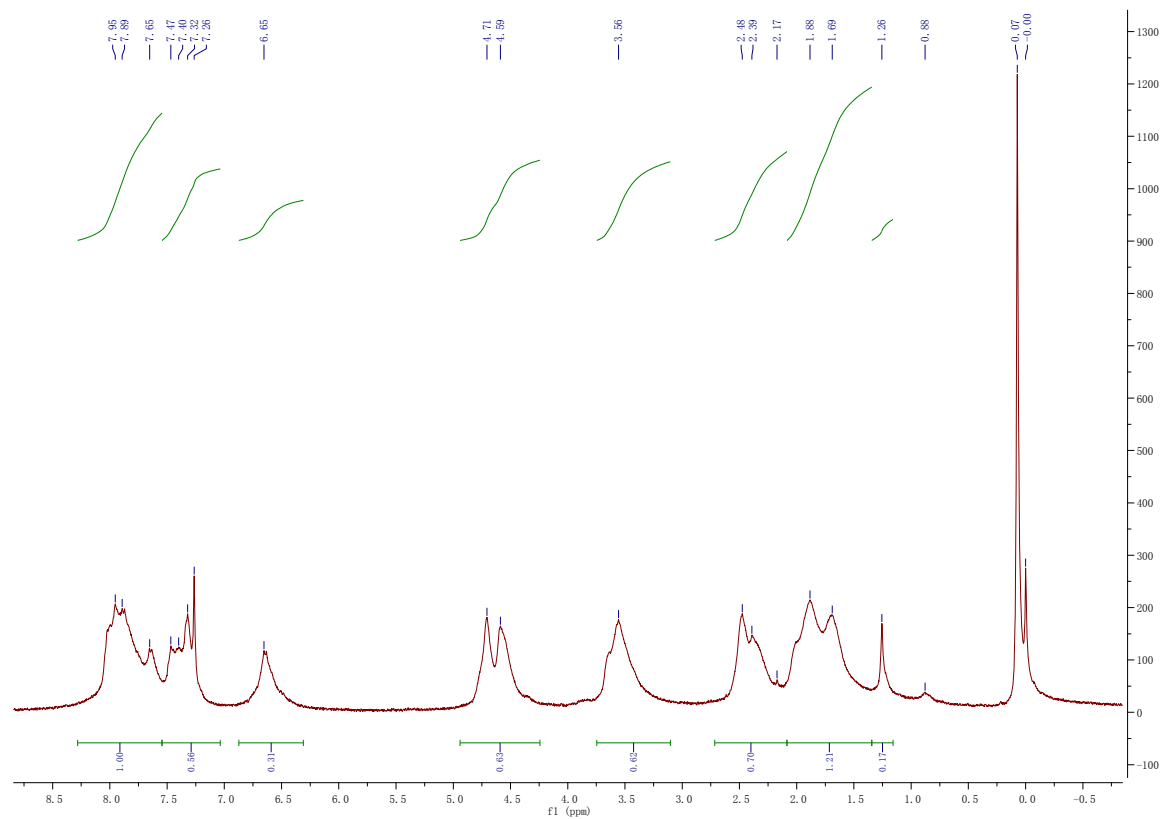

**Fig. S5**  $^1\text{H}$  NMR spectrum of hyperbranched polymer **P2** in chloroform-*d*.

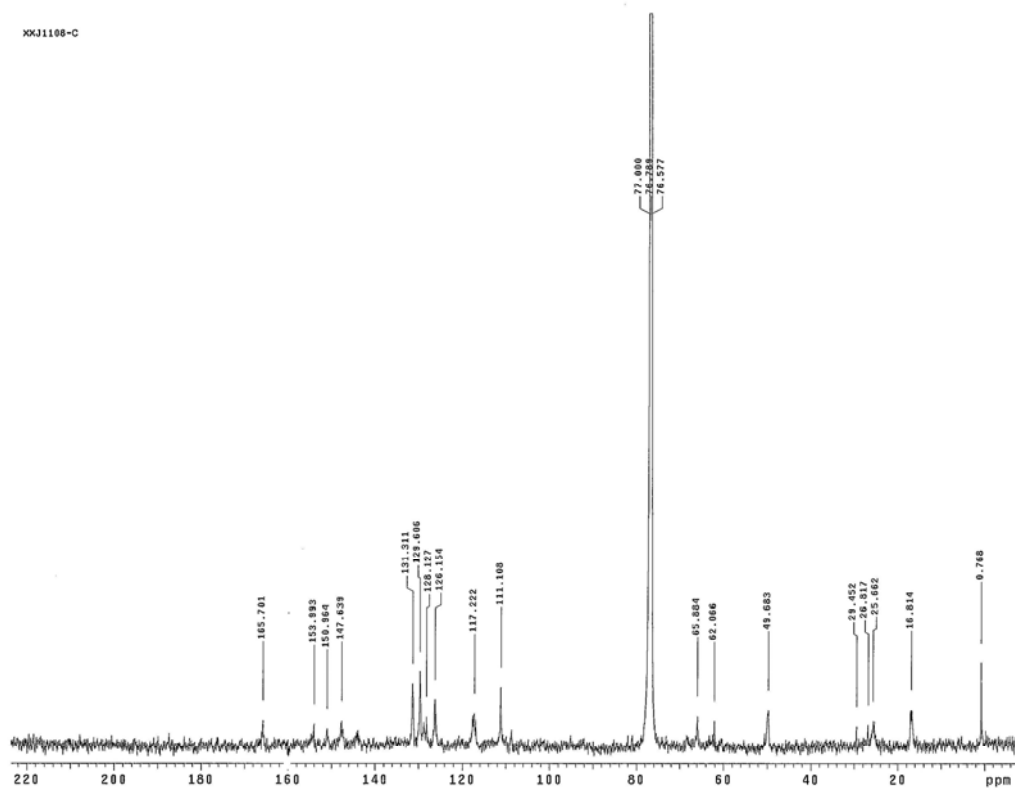

**Fig. S6**  $^{13}\text{C}$  NMR spectrum of hyperbranched polymer **P2** in chloroform-*d*.

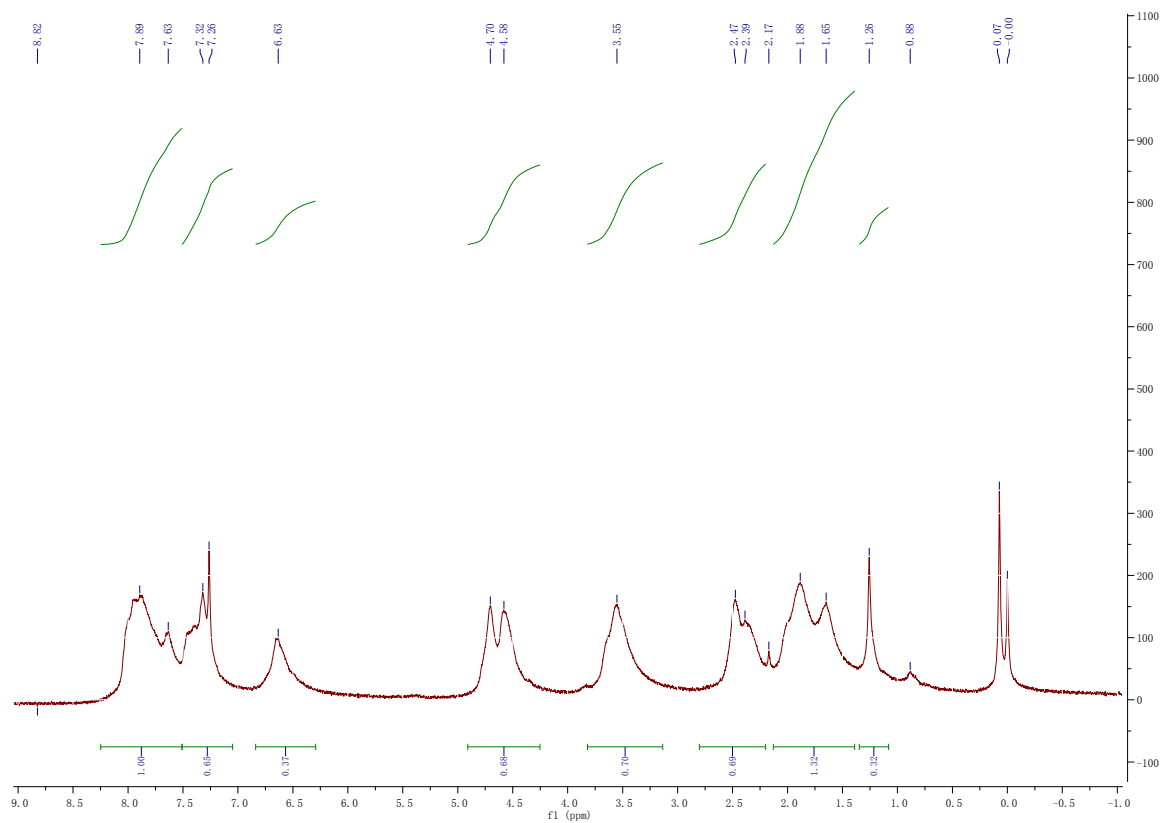

**Fig. S7**  $^1\text{H}$  NMR spectrum of hyperbranched polymer **P3** in  $\text{CDCl}_3$ .

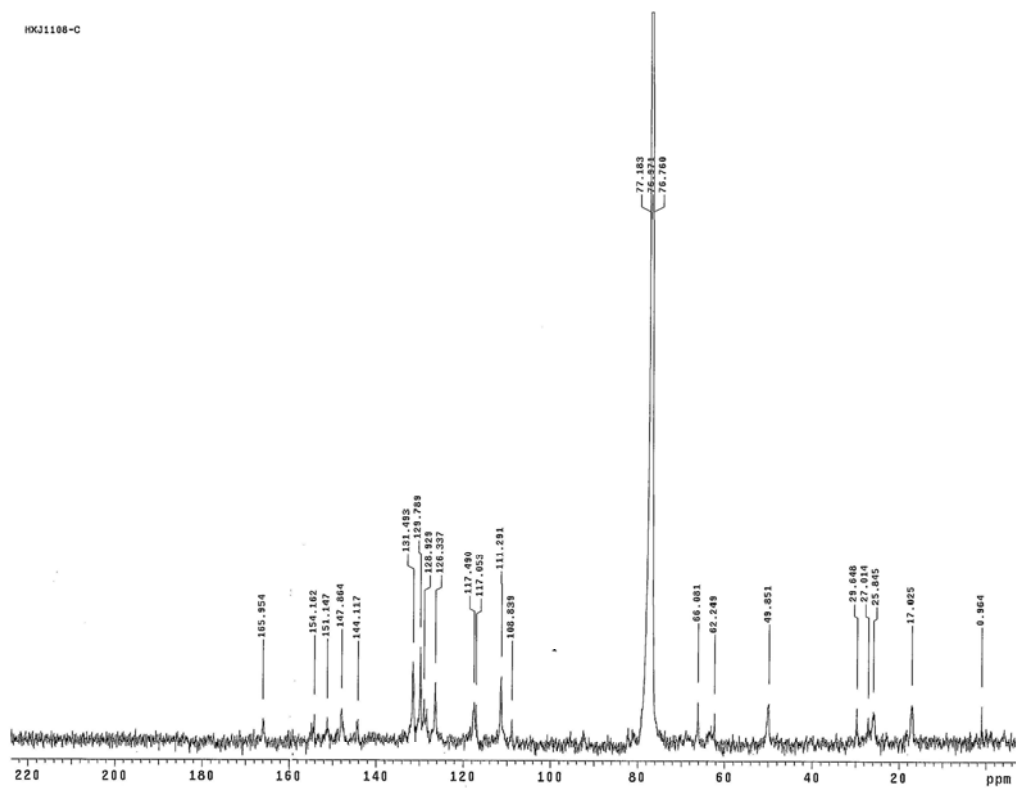

**Fig. S8**  $^{13}\text{C}$  NMR spectrum of hyperbranched polymer **P3** in  $\text{CDCl}_3$ .

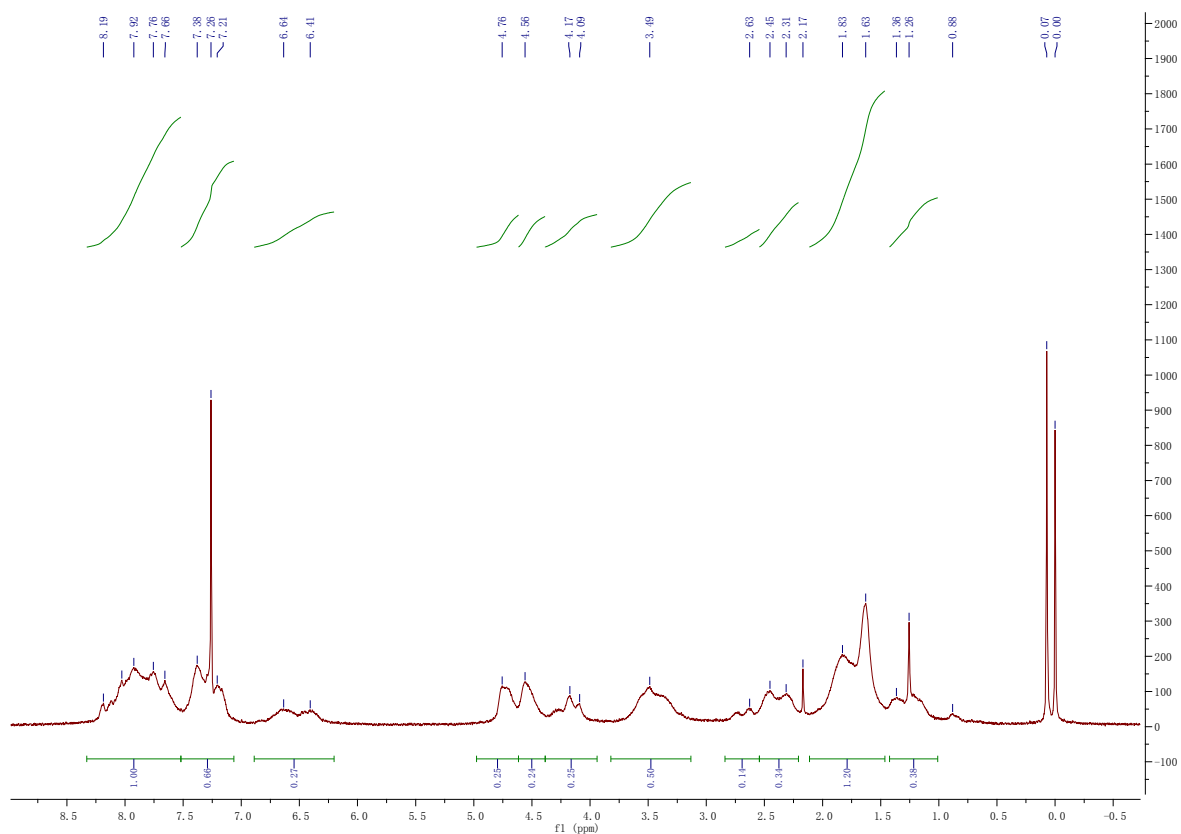

**Fig. S9**  $^1\text{H}$  NMR spectrum of hyperbranched polymer **P4** in chloroform-*d*.

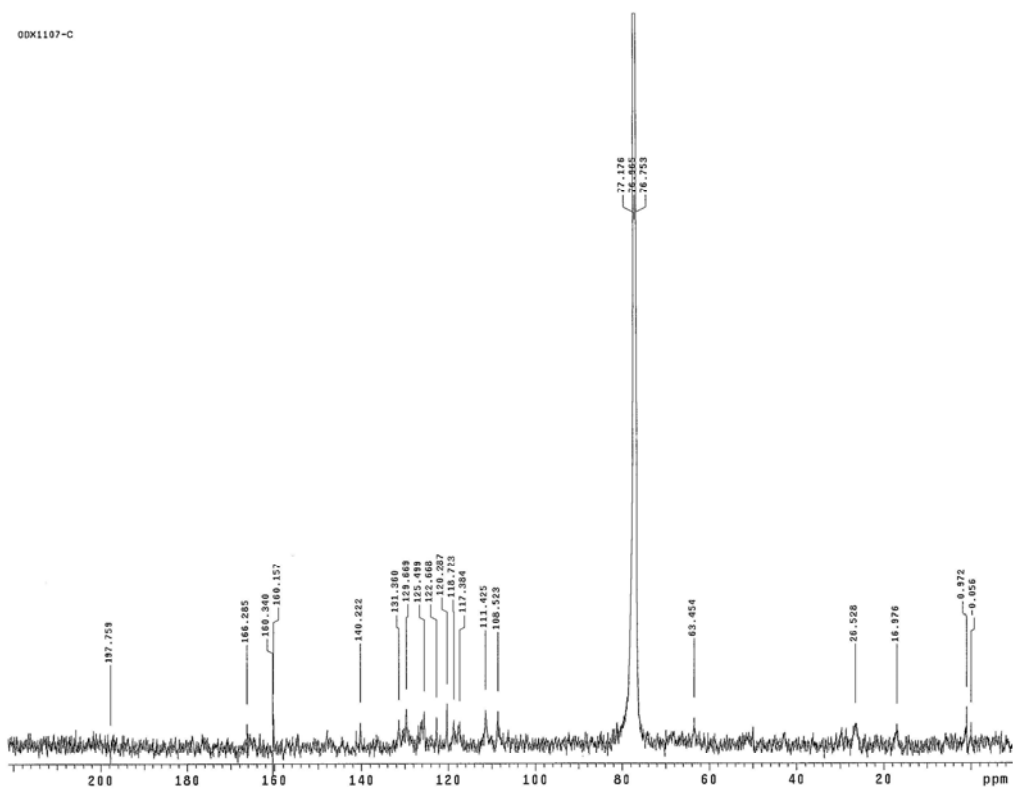

**Fig. S10**  $^{13}\text{C}$  NMR spectrum of hyperbranched polymer **P4** in chloroform-*d*.

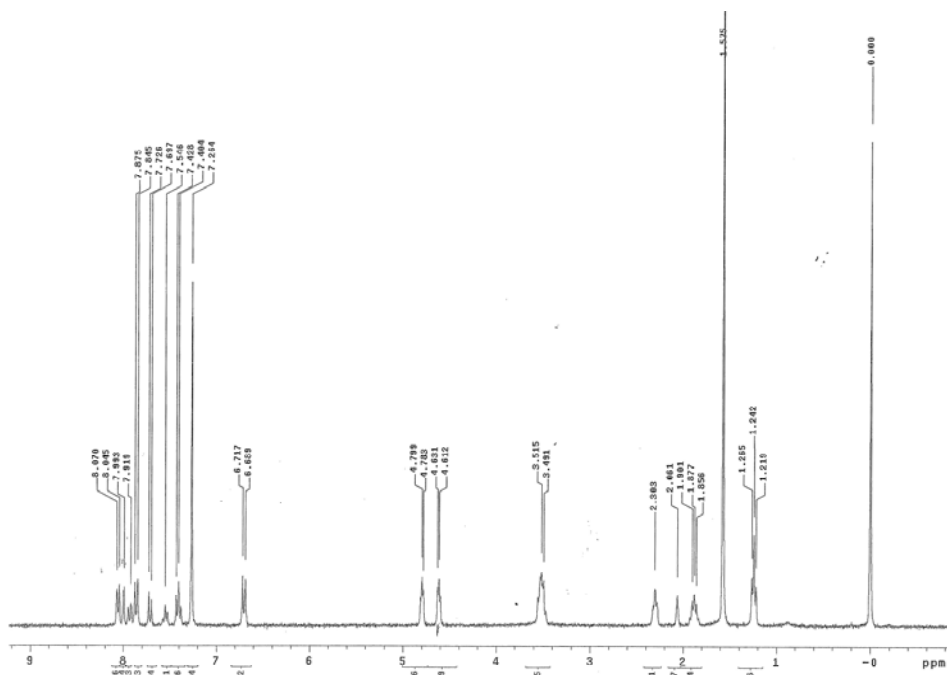

Fig. S11  $^1\text{H}$  NMR spectrum of compound **7** in chloroform-*d*.

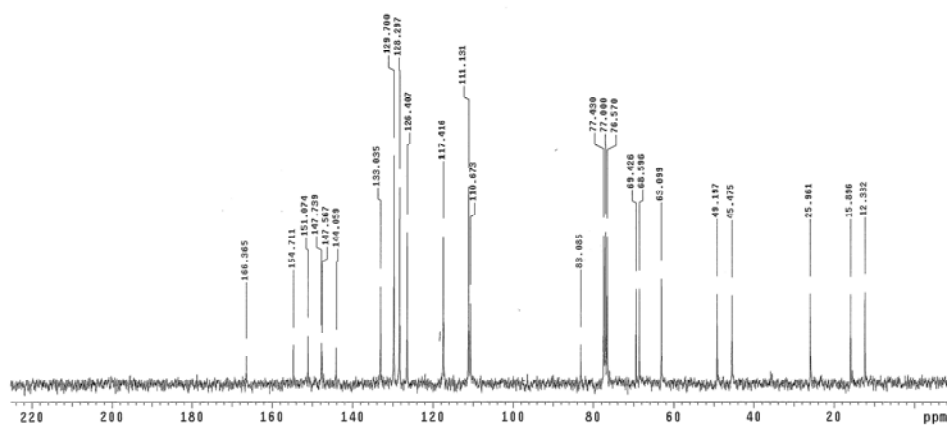

Fig. S12  $^{13}\text{C}$  NMR spectrum of compound **7** in chloroform-*d*.

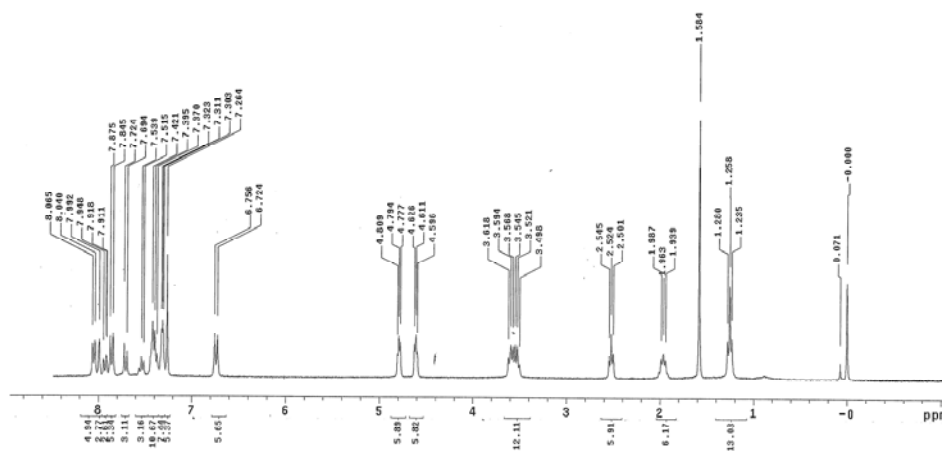

Fig. S13  $^1\text{H}$  NMR spectrum of compound **8** in chloroform-*d*.



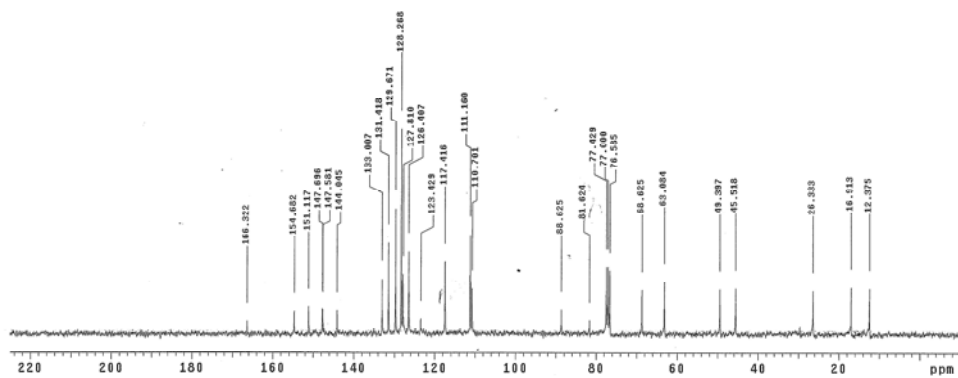

Fig. S14 <sup>13</sup>C NMR spectrum of compound **8** in chloroform-*d*.

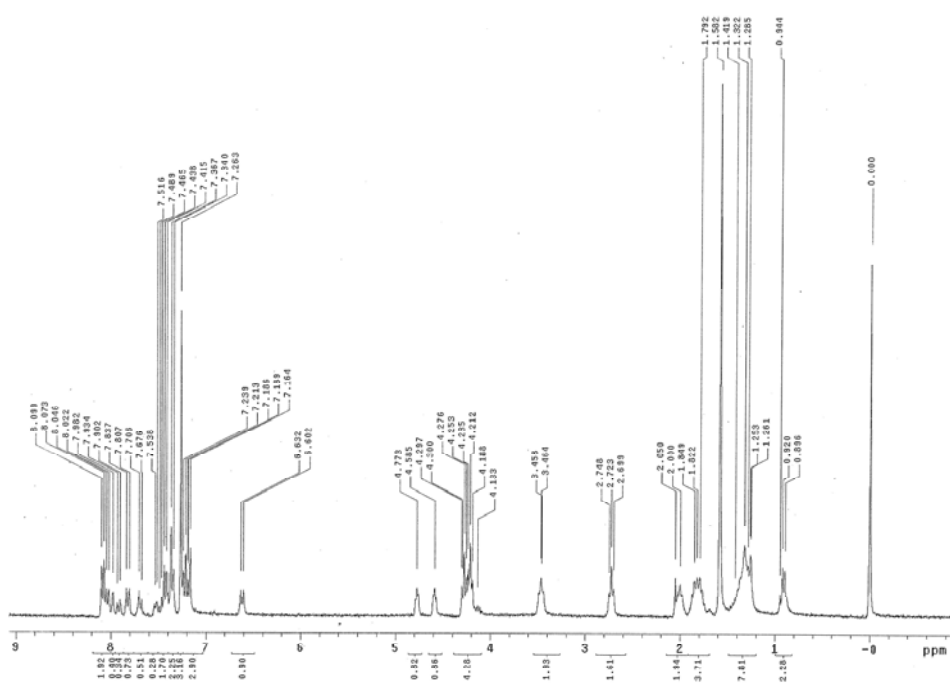

Fig. S15 <sup>1</sup>H NMR spectrum of compound **10** in chloroform-*d*.

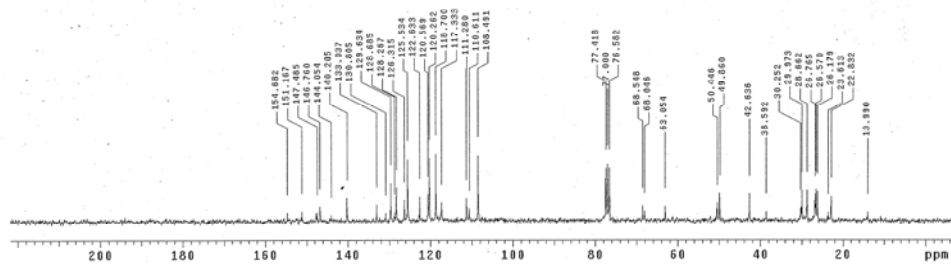

Fig. S16 <sup>13</sup>C NMR spectrum of compound **10** in chloroform-*d*.

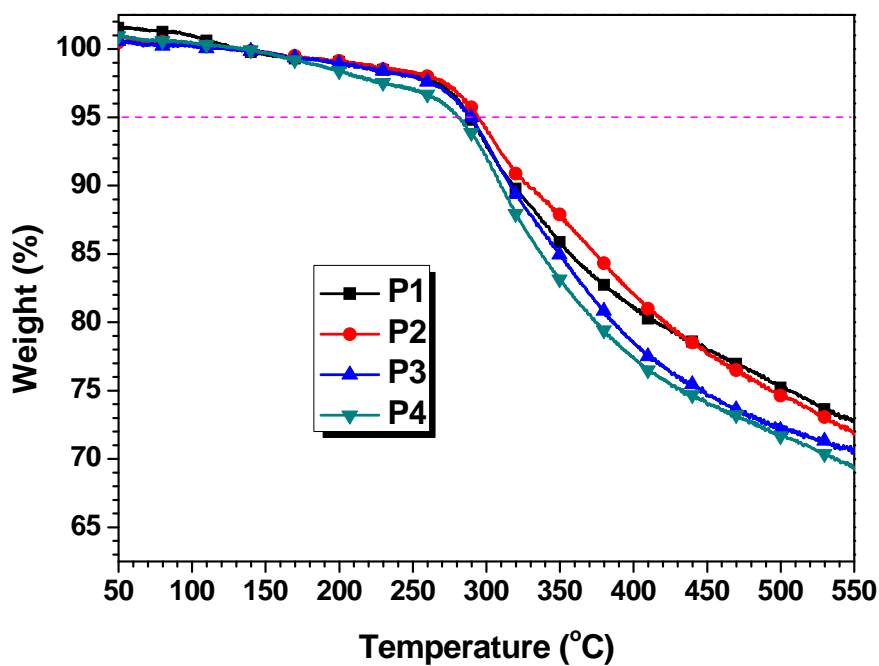

**Fig. S17** TGA thermograms of polymers **P1-P4**, measured in nitrogen at a heating rate of 10 °C/min.

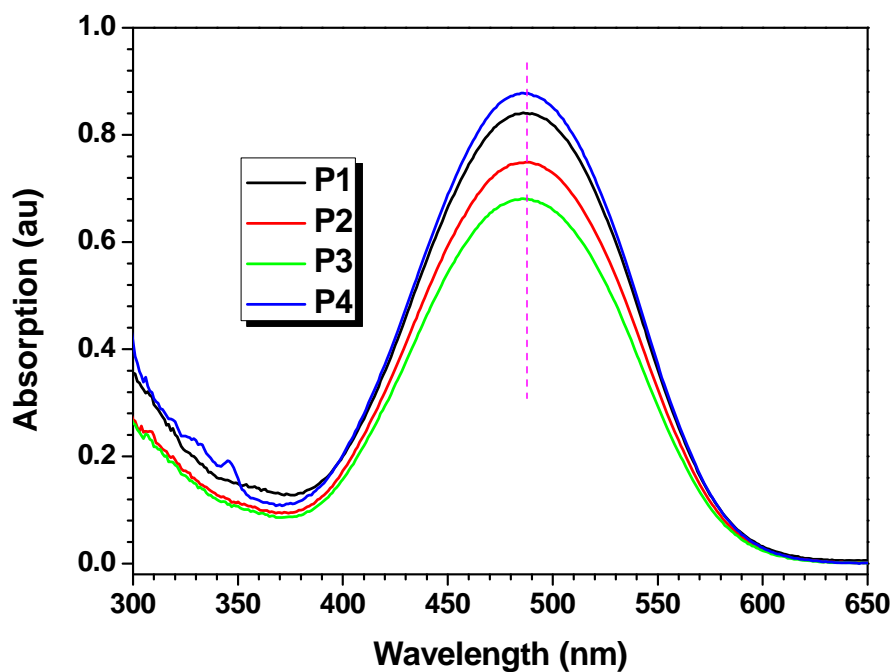

**Fig. S18** UV-vis spectra of polymers **P1-P4** in THF (0.02 mg/mL).

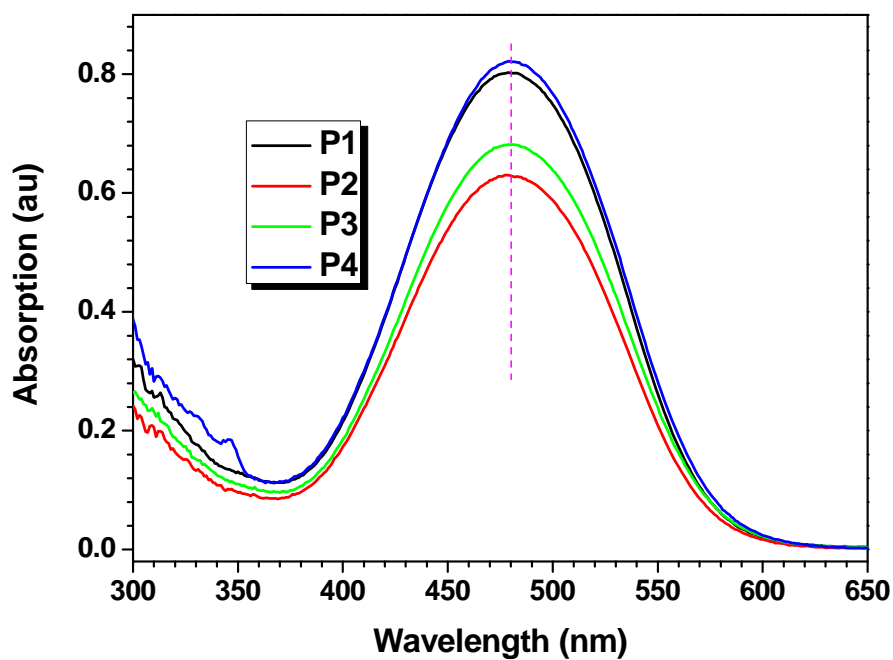

Fig. S19 UV-vis spectra of polymers **P1-P4** in 1,4-dioxane (0.02 mg/mL).

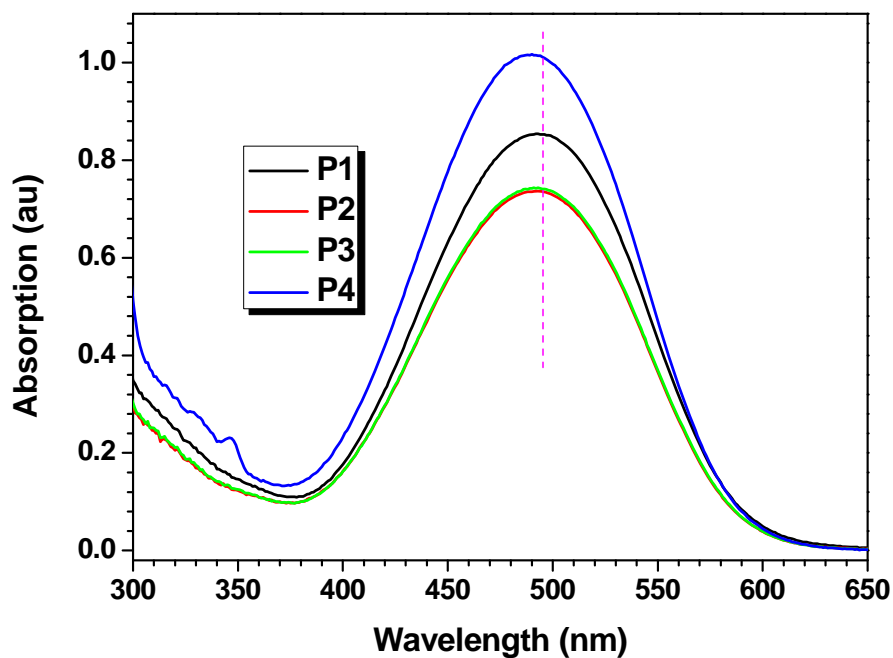

Fig. S20 UV-vis spectra of polymers **P1-P4** in chloroform (0.02 mg/mL).

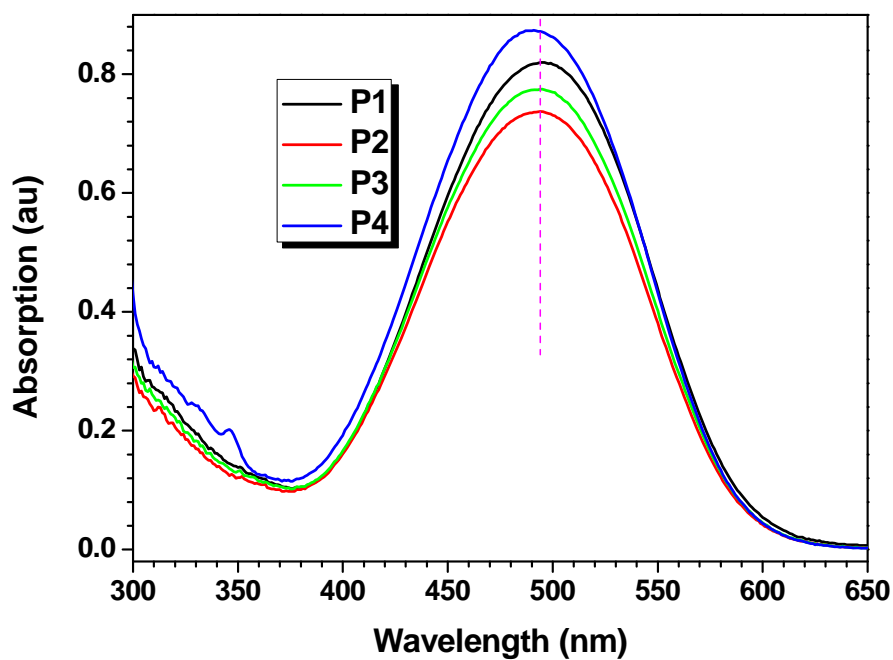

Fig. S21 UV-vis spectra of polymers **P1-P4** in dichloromethane (0.02 mg/mL).

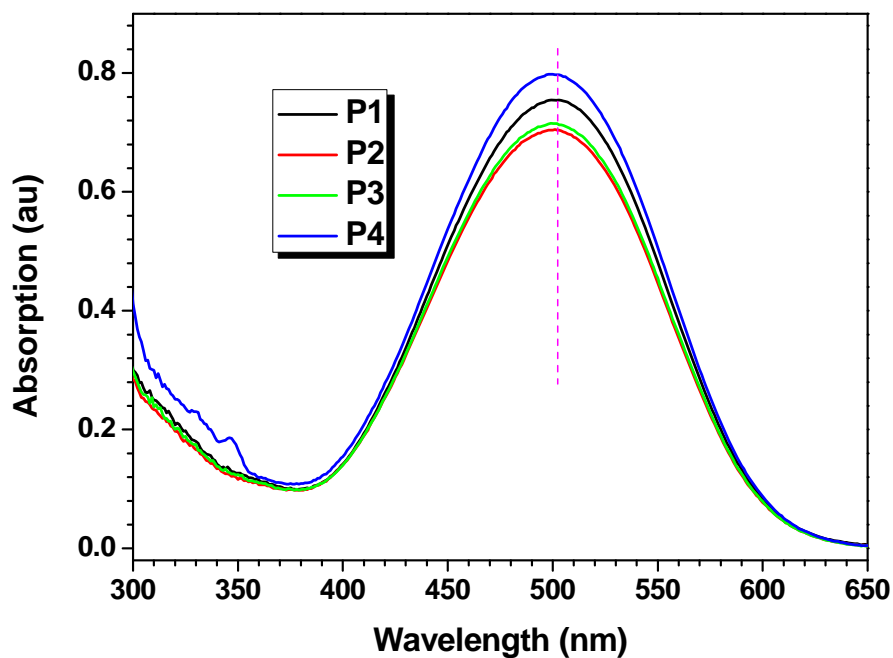

Fig. S22 UV-vis spectra of polymers **P1-P4** in DMF (0.02 mg/mL).

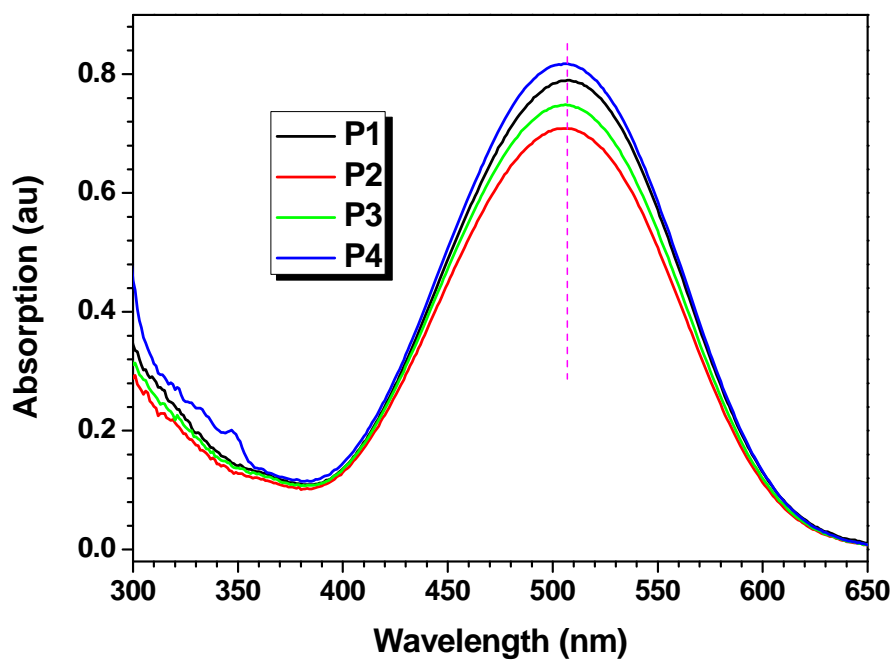

Fig. S23 UV-vis spectra of polymers **P1-P4** in DMSO (0.02 mg/mL).

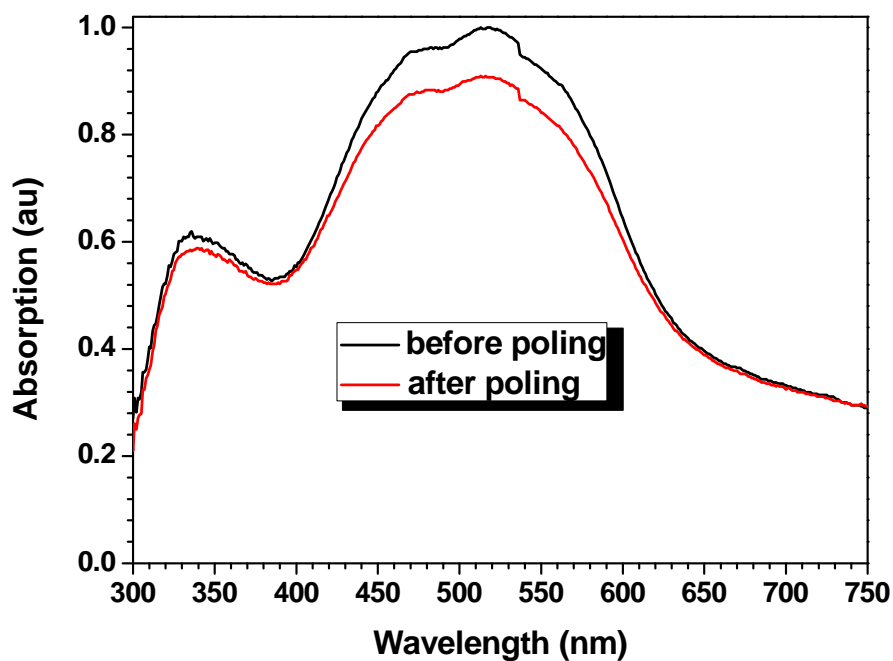

Fig. S24 Absorption spectra of the film of **P1** before and after poling.

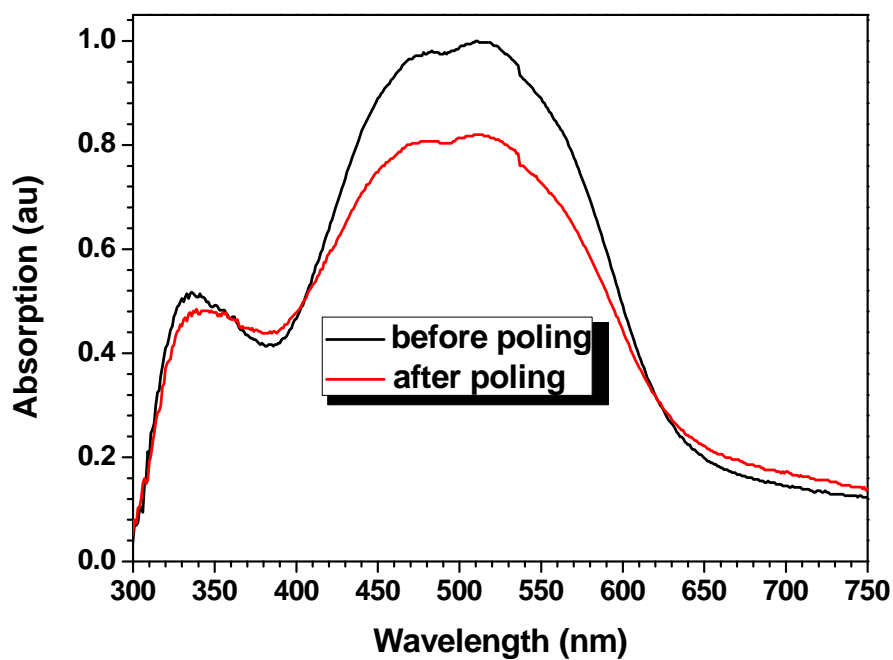

Fig. S25 Absorption spectra of the film of **P2** before and after poling.

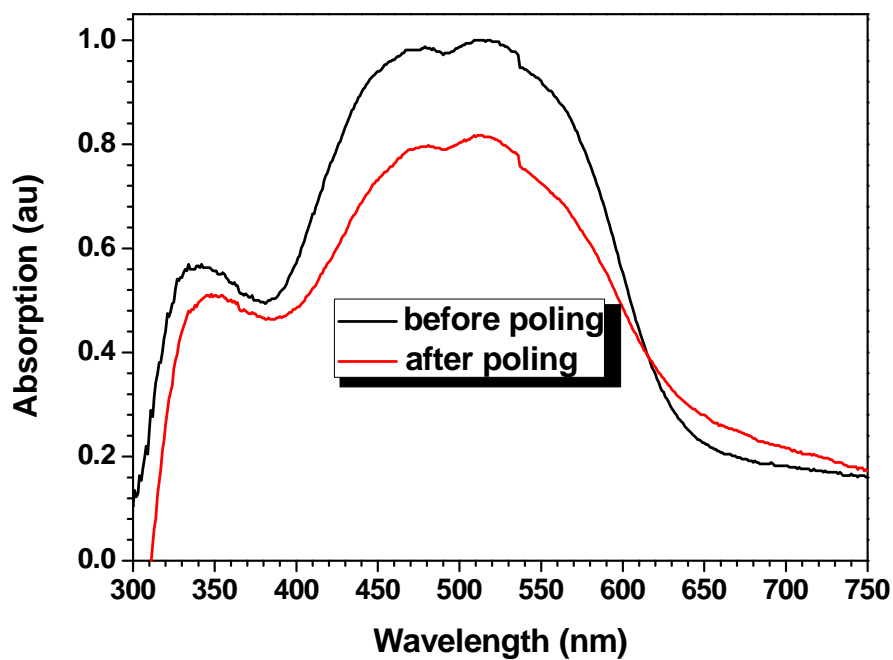

Fig. S26 Absorption spectra of the film of **P3** before and after poling.

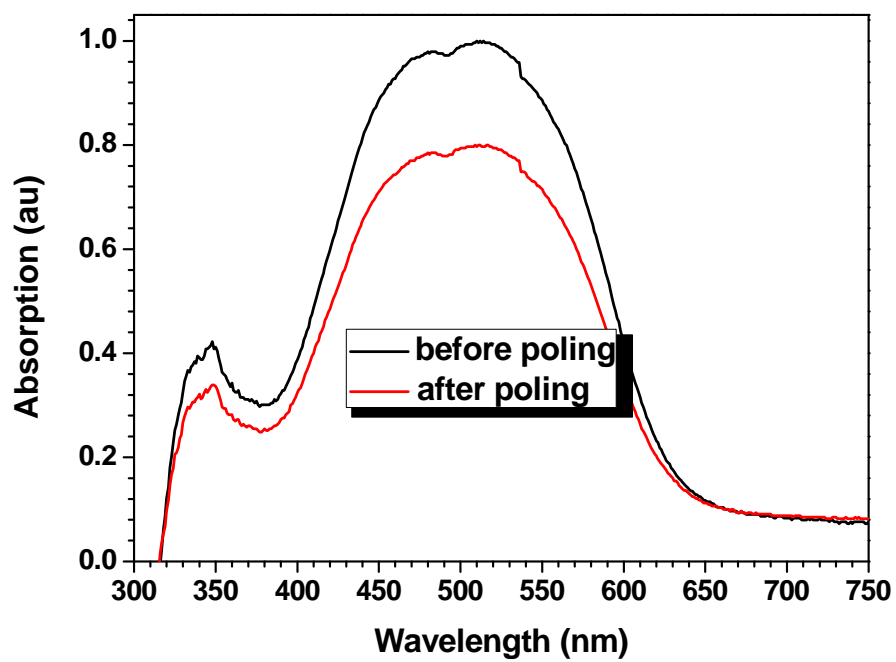

**Fig. S27** Absorption spectra of the film of **P4** before and after poling.
